# Supplementary material for: Health Care Costs of Individuals With Chronic Psychotic Disorders Who Experience Incarceration in Ontario
Source: Atypon-hosted journal article supplement (doi:10.1176/appi.ps.202100150), 2021-12-21
Supplement: appi.ps.202100150.ds001.pdf [file appi.ps.202100150.ds001.pdf]

**Table A1.** Administrative health care databases

| Database                                  | Setting                                                                    | Description                                                                                                                                                                                                                                                                                                                                 |
|-------------------------------------------|----------------------------------------------------------------------------|---------------------------------------------------------------------------------------------------------------------------------------------------------------------------------------------------------------------------------------------------------------------------------------------------------------------------------------------|
| Discharge Abstract Database               | acute care hospitalisations                                                | The Discharge Abstract Database is a national database, which contains demographic and clinical data on all acute care inpatient hospitalisations. It also includes data on psychiatric inpatient hospitalisations for children and adolescents and psychiatric inpatient hospitalisations, which occur in non-psychiatric designated beds. |
| Ontario Mental Health Reporting System    | psychiatric hospitalisations                                               | The Ontario Mental Health Reporting System collects demographic and clinical data on all adult psychiatric inpatient hospitalisations in Ontario.                                                                                                                                                                                           |
| Continuing Care Reporting System          | complex continuing care, long-term care                                    | The Continuing Care Reporting System contains demographic and clinical information on individuals receiving facility-based continuing care. These services include medical long-term care, rehabilitation, geriatric assessment, respite palliative care, and nursing home care.                                                            |
| National Rehabilitation Reporting System  | rehabilitation                                                             | The National Rehabilitation Reporting System contains national data on rehabilitation facilities and clients, collected from participating adult inpatient rehabilitation facilities and programs.                                                                                                                                          |
| National Ambulatory Care Reporting System | emergency department visits, same-day surgery and outpatient clinic visits | The National Ambulatory Care Reporting System contains data on all ambulatory care including emergency department visits, day surgery and outpatient clinic visits (for example, chemotherapy and dialysis).                                                                                                                                |
| Ontario Health Insurance Plan             | physician and outpatient                                                   | The Ontario Health Insurance Plan Claims Database covers all services and                                                                                                                                                                                                                                                                   |

|                                      |                               |                                                                                                                                                                                                                                                                                                                                                                                                                                                                                                                                           |
|--------------------------------------|-------------------------------|-------------------------------------------------------------------------------------------------------------------------------------------------------------------------------------------------------------------------------------------------------------------------------------------------------------------------------------------------------------------------------------------------------------------------------------------------------------------------------------------------------------------------------------------|
| Claims Database                      | services                      | procedures provided by health care providers who can claim under the Ontario Health Insurance Plan (such as, physician and laboratory/diagnostic services).                                                                                                                                                                                                                                                                                                                                                                               |
| Ontario Drug Benefit Claims Database | outpatient prescription drugs | The Ontario Drug Benefit Claims Database includes data on all drugs dispensed in community pharmacies and long-term care/nursing facilities. The Ontario Drug Benefit program covers prescription drugs listed in the provincial formulary for all seniors (aged 65 and over) as well as those under the age of 65 living in a long-term care home, a home for special care or a Community Home for Opportunity, receiving professional home and community care services, enrolled in the Trillium Drug Program, or on social assistance. |
| Home Care Database                   | home care                     | The Home Care Database provides data on government-funded services coordinated by Ontario's Community Care Access Centres for individuals requiring home care.                                                                                                                                                                                                                                                                                                                                                                            |
